# Supplementary material for: Nickel catalyzed one pot synthesis of biaryls under air at room temperature
Source: Royal Society of Chemistry journal article supplement (doi:10.1039/c3ra43363c), 2013-01-01
Supplement: c3ra43363c.pdf [file c3ra43363c.pdf]

## Nickel Catalyzed One Pot Synthesis of Biaryls under Air at Room Temperature

Aparna P. I. Bhat,<sup>a</sup> Fawad Inam<sup>b</sup> and Badekai Ramachandra Bhat<sup>\*a</sup>

<sup>a</sup> *Catalysis and Materials Laboratory, Department of Chemistry, National Institute of Technology Karnataka, Surathkal, Srinivasanagar-575025, India.*

<sup>b</sup> *Faculty of Engineering and Environment, Northumbria University, Newcastle upon Tyne, NE1 8ST, United Kingdom.*

### Supporting data

#### Characterization data

All the compounds gave satisfactory spectroscopic values which are given below and are analogue to spectroscopic data reported in the literature. Elemental analyses are given for each compound.

**4,4'-Dimethoxybiphenyl (2a):** Yield: (0.5913 g, 92%) white solid; mp: 178-180 °C, Lit.<sup>1</sup> = 179 °C; <sup>1</sup>H NMR δ<sub>H</sub> (500 MHz, CDCl<sub>3</sub>): 3.84 (s, 6H), 6.96 (d, J = 9.0 Hz, 4H), 7.48 (d, J = 8.5 Hz, 4H); <sup>13</sup>C NMR δ<sub>C</sub> (125 MHz, CDCl<sub>3</sub>): 55.5, 114.4, 127.9, 133.6, 158.9; **Elemental analysis** calcd for C<sub>14</sub>H<sub>14</sub>O<sub>2</sub> (%): C, 78.48; H, 6.59; O, 14.93. found: C, 78.23; H, 6.44; O, 14.78.

**2,2'-Dimethoxybiphenyl (2b):** Yield: (0.5078 g, 79%); white solid; mp: 154.5-156 °C, Lit.<sup>1</sup> = 156 °C; <sup>1</sup>H NMR (500 MHz, CDCl<sub>3</sub>) δ: 3.77 (s, 6H), 6.99 (m, 4H), 7.28 (d, J = 7.0 Hz, 2H), 7.32 (t, J = 7.0 Hz, 2H); <sup>13</sup>C NMR (125 MHz, CDCl<sub>3</sub>) δ: 55.8, 111.3, 120.5, 127.9, 128.8, 131.6, 157.2; **Elemental analysis** calcd for C<sub>14</sub>H<sub>14</sub>O<sub>2</sub> (%): C, 78.48; H, 6.59; O, 14.93. found: C, 78.35; H, 6.28; O, 14.84.

**4,4'-Dimethylbiphenyl (2c):** Yield: (0.7834 g, 86%); white solid; mp: 124-125 °C, Lit.<sup>2</sup> = 125 °C; <sup>1</sup>H NMR (500 MHz, CDCl<sub>3</sub>) δ: 2.38 (s, 6H), 7.24 (d, J = 8.0 Hz, 4H), 7.48 (d, J = 8.0 Hz, 4H); <sup>13</sup>C NMR (125 MHz, CDCl<sub>3</sub>) δ: 21.3, 127.0, 129.7, 136.8, 138.5; **Elemental analysis** calcd for C<sub>14</sub>H<sub>14</sub> (%): C, 92.26; H, 7.74. found: C, 92.18; H, 7.64.

**2,2'-Dimethylbiphenyl (2d):** Yield: (0.6832 g, 75%); yellow liquid; bp: 259 °C, Lit.<sup>3</sup> = 257 °C; <sup>1</sup>H NMR (400 MHz, CDCl<sub>3</sub>) δ: 2.05 (s, 6H), 7.11 (d, J = 8.8 Hz, 2H), 7.22-7.25 (m, 6H); <sup>13</sup>C NMR (100 MHz, CDCl<sub>3</sub>): δ = 18.8, 124.5, 126.1, 128.2, 128.7, 134.8, 140.6; **Elemental analysis** calcd for C<sub>14</sub>H<sub>14</sub> (%): C, 92.26; H, 7.74. found: C, 92.29; H, 7.37.

**Biphenyl (2e):** Yield: (0.1.279 g, 83%); white solid; mp: 67-69 °C, Lit.<sup>1</sup> = 68 °C; <sup>1</sup>H NMR (500 MHz, CDCl<sub>3</sub>) δ: 7.34 (t, J = 7.3 Hz, 2H), 7.44 (t, J = 7.5 Hz, 4H), 7.60 (d, J = 7.5 Hz, 4H); <sup>13</sup>C NMR (125 MHz, CDCl<sub>3</sub>) δ: 127.3, 127.4, 128.7, 141.4; **Elemental analysis** calcd for C<sub>12</sub>H<sub>10</sub> (%): C, 93.46; H, 6.54. found: C, 93.28; H, 6.48.

**4,4'-Dichlorobiphenyl (2f):** Yield: (0.8477 g, 76%); white solid; mp: 150 °C, Lit.<sup>4</sup> = 149 °C; <sup>1</sup>H NMR (400 MHz, CDCl<sub>3</sub>) δ: 7.39 (d, J = 7.6 Hz, 4H), 7.46 (d, J = 8 Hz, 4H); <sup>13</sup>C NMR (100 MHz, CDCl<sub>3</sub>) δ: 127.2, 128.0, 132.7, 137.4; **Elemental analysis** calcd for C<sub>12</sub>H<sub>8</sub>Cl<sub>2</sub> (%): C, 64.60; H, 3.61. found: C, 64.12; H, 3.38.

**2,2'-Dinitrobiphenyl (2g):** Yield: (0.3175 g, 65%); pale brown solid; mp: 120-122 °C, Lit.<sup>1</sup> = 120 °C; <sup>1</sup>H NMR (500 MHz, CDCl<sub>3</sub>) δ: 7.31 (d, J = 7.5 Hz, 2H), 7.59 (t, J=7.25 Hz, 2H), 7.68 (t, J = 7 Hz, 2H), 8.23 (d, J = 8 Hz, 2H); <sup>13</sup>C NMR (125 MHz, CDCl<sub>3</sub>) δ: 124.8, 129.2, 131.0, 133.6, 134.2, 147.2; **Elemental analysis** calcd for C<sub>12</sub>H<sub>8</sub>N<sub>2</sub>O<sub>4</sub>(%): C, 59.02; H, 3.30; N, 11.47; O, 26.21 found: C, 58.96; H, 3.12; N, 11.34; O, 26.15.

**4,4'-Dicyanobiphenyl (2h):** Yield: (0.2491 g, 61%); white solid; mp: 234 °C, Lit.<sup>1</sup> = 233-234 °C; <sup>1</sup>H-NMR (500 MHz, CDCl<sub>3</sub>): 7.68-7.74 (m, 4 H), 7.75-7.82 (m, 4 H); <sup>13</sup>C-NMR (125 MHz, CDCl<sub>3</sub>): 112.4, 118.4, 127.9, 132.8, 143.5; **Elemental Analysis** calcd For C<sub>14</sub>H<sub>8</sub>N<sub>2</sub> (%): C, 82.33; H, 3.95; N, 13.72. found: C, 82.15; H, 4.13; N, 13.45.

**1,1'-Binaphthyl (2i):** Yield: (0.6917 g, 68%); white solid; mp: 157 °C, Lit.<sup>5</sup> = 155-156°C; <sup>1</sup>H NMR (300 MHz, CDCl<sub>3</sub>) δ : 7.26-7.62 (m, 10H), 7.96 (d, *J* = 8.1, 4H); <sup>13</sup>C NMR (75 MHz, CDCl<sub>3</sub>) δ: 125.5, 125.9, 126.1, 126.7, 127.9, 128.0, 128.3, 133.0, 133.6, 138.6; **Elemental analysis** calcd for C<sub>20</sub>H<sub>14</sub> (%): C, 94.45; H, 5.55. found: C, 94.18; H, 5.44.

**4,4'-Bipyridine (2j):** Yield: (0.2280 g, 73%); mp: 112 °C, Lit.<sup>1</sup> = 110 °C; <sup>1</sup>H NMR (500 MHz, CDCl<sub>3</sub>) δ: 7.55 (dd, *J* = 4.5 Hz, 4H), 8.75 (dd, *J* = 4.5 Hz, 4H); <sup>13</sup>C NMR (125 MHz, CDCl<sub>3</sub>) δ: 121.4, 145.4, 150.6; **Elemental analysis** calcd for C<sub>10</sub>H<sub>8</sub>N<sub>2</sub> (%): C, 76.90; H, 5.16; N, 17.94 found: C, 76.78; H, 5.10; N, 17.88.

The <sup>1</sup>H NMR, TG analysis of the ligand **L** and complex **NiL** are given in S4 – S7. The <sup>1</sup>H NMR and <sup>13</sup>C NMR spectra of the biaryl compounds are given in the S8 - S19.

## References

- 1 G. Cahiez, A. Moyeux, J. Buendia, C. Duplais, J. Am. Chem. Soc. 129 (2007) 13788-13789.
- 2 X. Xu, D. Cheng, W. Pei, J. Org. Chem. 71 (2006) 6637-6639.
- 3 S. Punna, D.D. Diaz, M.G. Finn, Synlett. 13 (2004) 2351-2354.
- 4 Y. Yamamoto, R. Suzuki, K. Hattori, H. Nishiyama, Synlett. 7 (2006) 1027-1030.
- 5 T. Hayashi, K. Hayashizaki, T. Kiyoi, Y. Ito, J. Am. Chem. Soc. 110 (1988) 8153-8156.

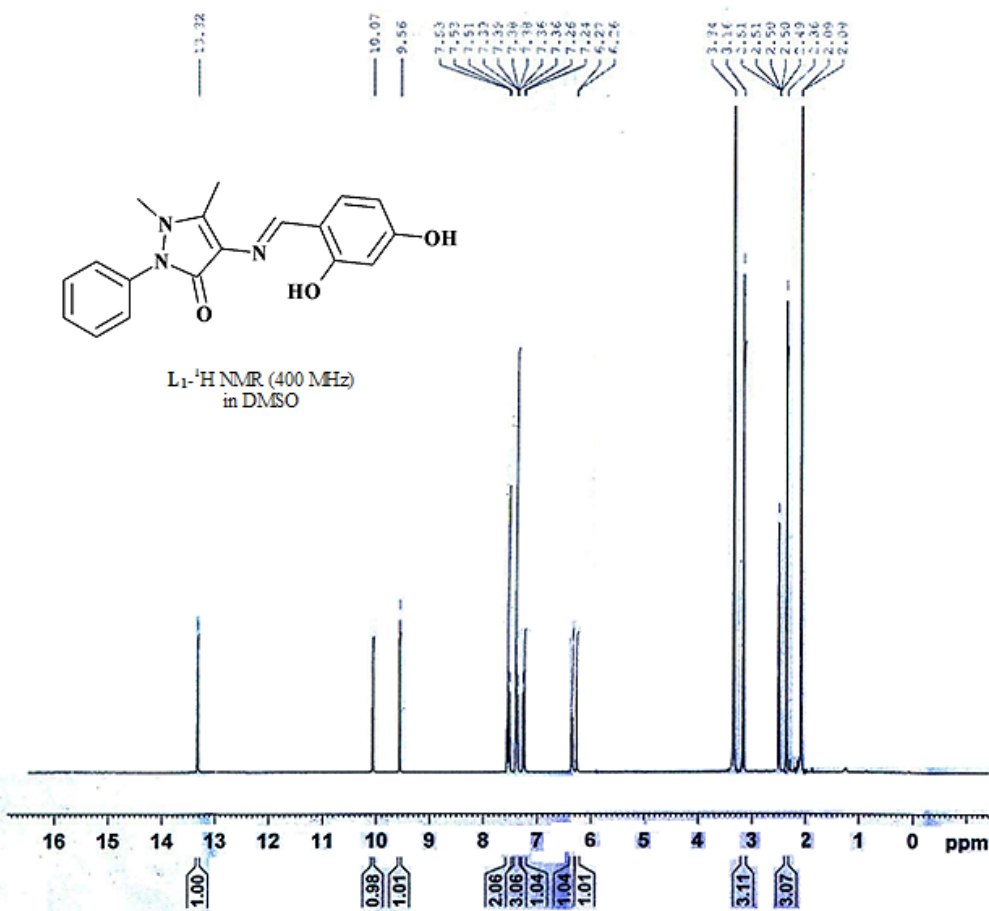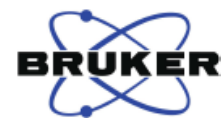

EXPNO 16  
PROCNO 1  
Date\_ 20110622  
Time 13.00  
INSTRUM spect  
PROBHD 5 mm PABBO BB-  
PULPROG zg30  
TD 32050  
SOLVENT DMSO  
NS 16  
DS 2  
SWH 8012.820 Hz  
FIDRES 0.250010 Hz  
AQ 1.9999700 sec  
RG 203  
LW 62.400 us  
DE 6.50 us  
TE 298.0 K  
D1 2.00000000 sec  
TD0 1

==== CHANNEL f1 =====  
NUC1 1H  
P1 14.10 us  
PL1 -3.00 dB  
PL1W 13.42244530 W  
SFO1 400.2336021 MH  
SI 65536  
SF 400.2300095 MH  
WEN EM  
SSB 0  
LB 0.30 Hz  
GB 0  
PC 1.00

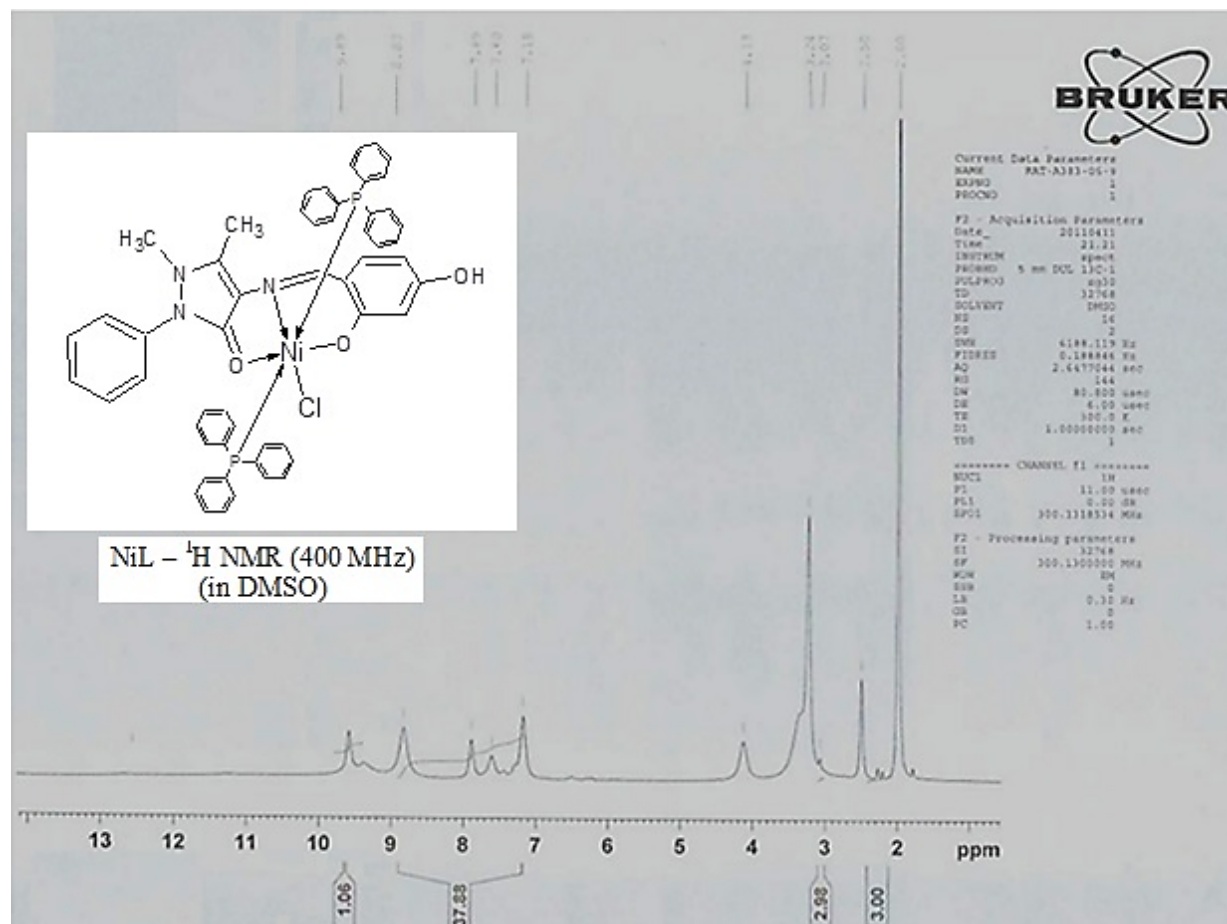

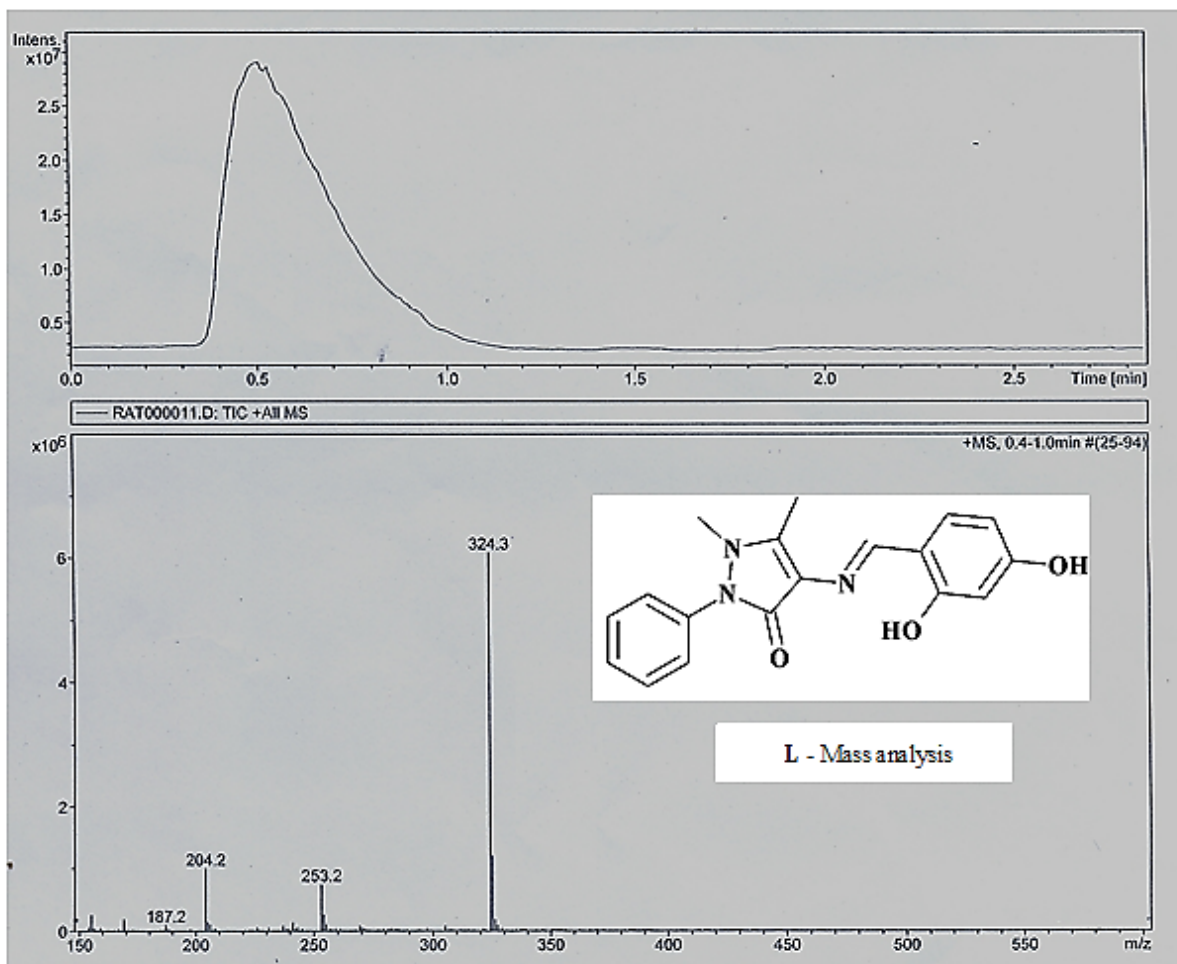

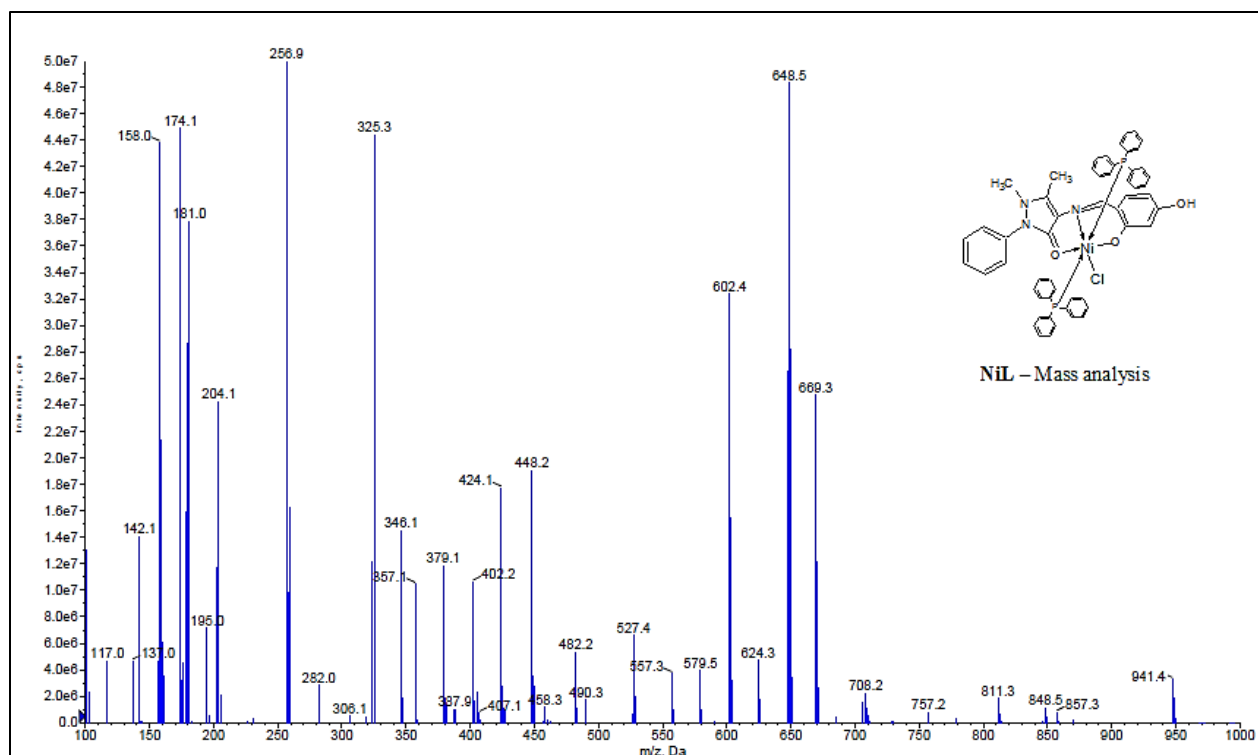

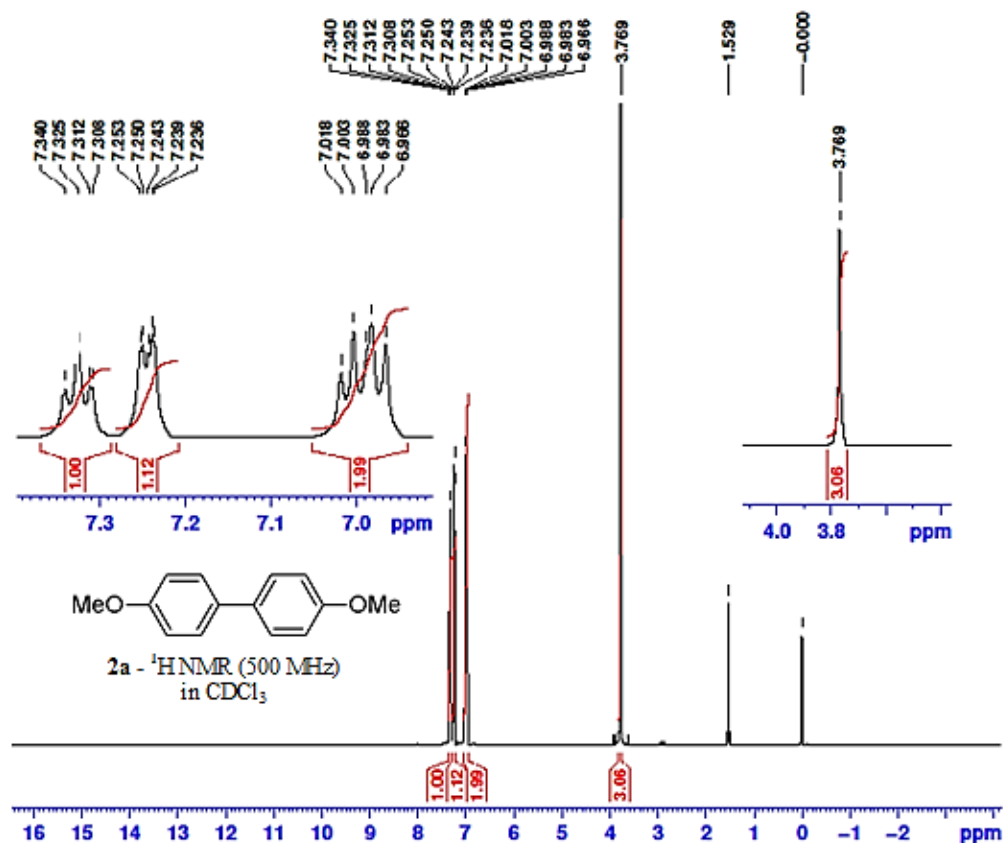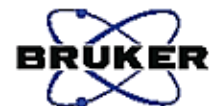

Current Data Parameters  
NAME Z  
EXPNO 1  
PROCNO 1

F2 - Acquisition Parameter  
Date\_ 20121013  
Time 16.08  
INSTRUM spect  
PROBHD 5 mm PABBO BH/  
PULPROG zg30  
TD 65536  
SOLVENT CDCl3  
NS 16  
DS 2  
SWH 10330.578 Hz  
FIDRES 0.157632 Hz  
AQ 3.1719923 sec  
RG 75.89  
DM 48.400 us  
DE 6.50 us  
TE 296.8 K  
D1 1.00000000 sec  
TDO 1

==== CHANNEL f1 ====  
NUC1 1H  
P1 11.50 us  
PLM1 18.00000000 W  
SFO1 500.3030896 MHz

F2 - Processing parameters  
SI 65536  
SF 500.3000211 MHz  
WDW EM  
SSB 0  
LB 0.30 Hz  
GB 0  
PC 1.00



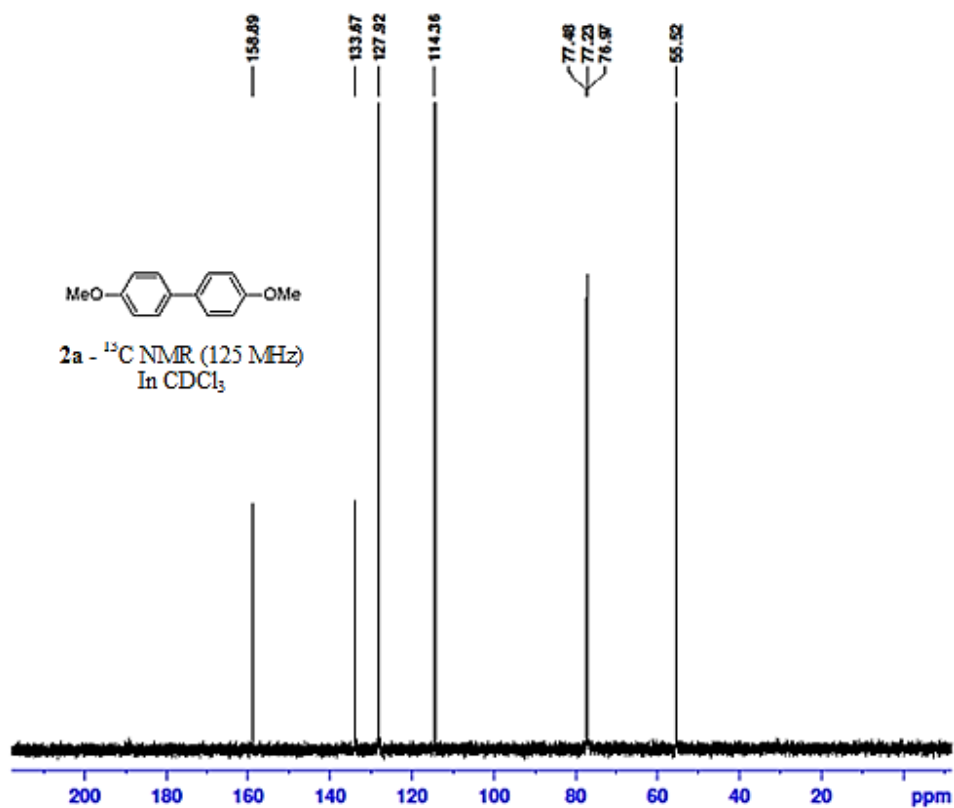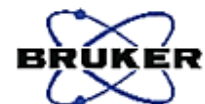

```
Current Data Parameters
NAME      N17K-B
EXPNO     1
PROCNO    1

F2 - Acquisition Parameters
Date_     20121017
Time      14.03
INSTRUM   spect
PROBHD    5 mm PABBO mm/
PULPROG   zgpg30
TD         65536
SOLVENT   cdcl3
NS         307
DS         4
SWH        29761.904 Hz
FIDRES     0.454131 Hz
AQ         1.1010548 sec
RG         186.93
DM         16.800 usec
DE         6.50 usec
TE         297.3 K
D1         2.00000000 sec
D11        0.03000000 sec
TDO        1

===== CHANNEL f1 =====
NUC1       13C
P1         9.73 usec
PLW1       76.00000000 W
SFO1       125.8131145 MHz

===== CHANNEL f2 =====
CFDPRG2    waltz16
NUC2       1H
PCPD2      80.00 usec
PLW2       18.00000000 W
PLW12      0.37195000 W
PLW13      0.23805000 W
SFO2       500.3020012 MHz

F2 - Processing parameters
SI         32768
SF         125.8005151 MHz
WDW        EM
SSB        0
LB         1.00 Hz
GB         0
PC         1.40
```

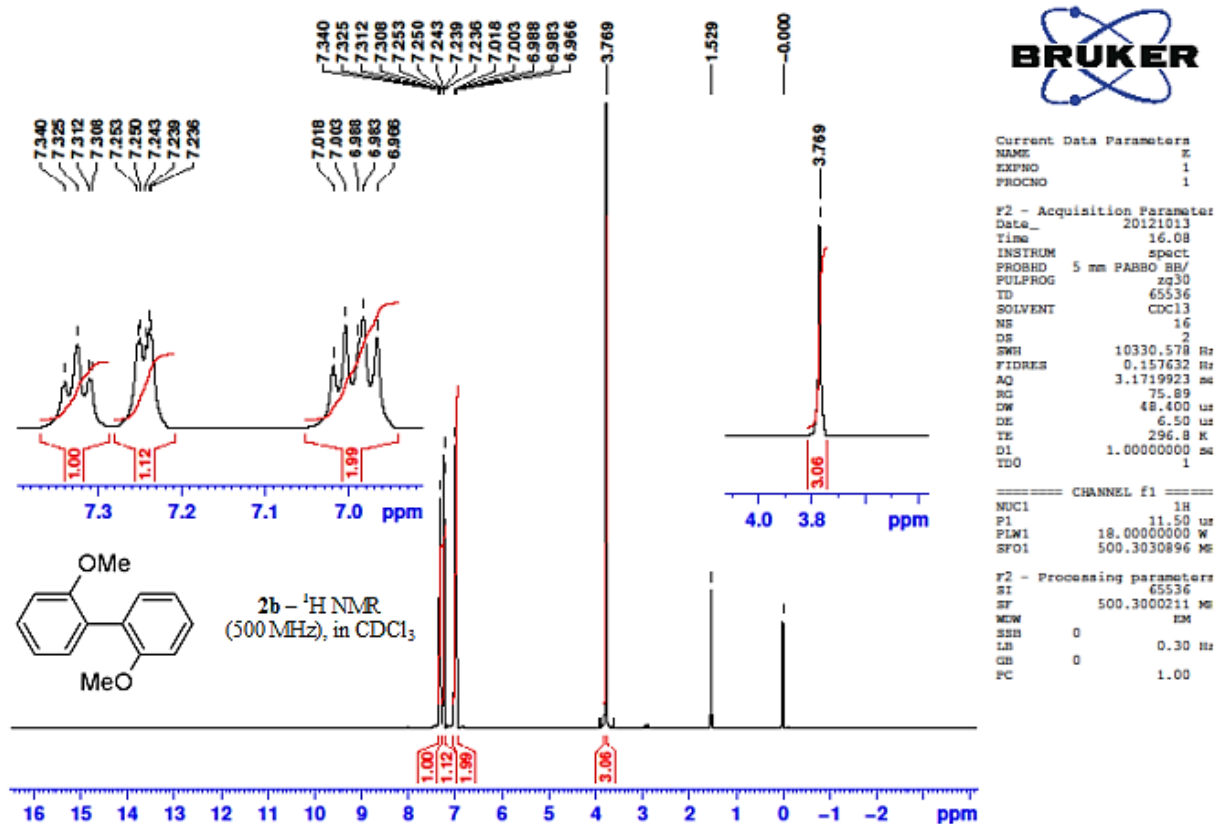

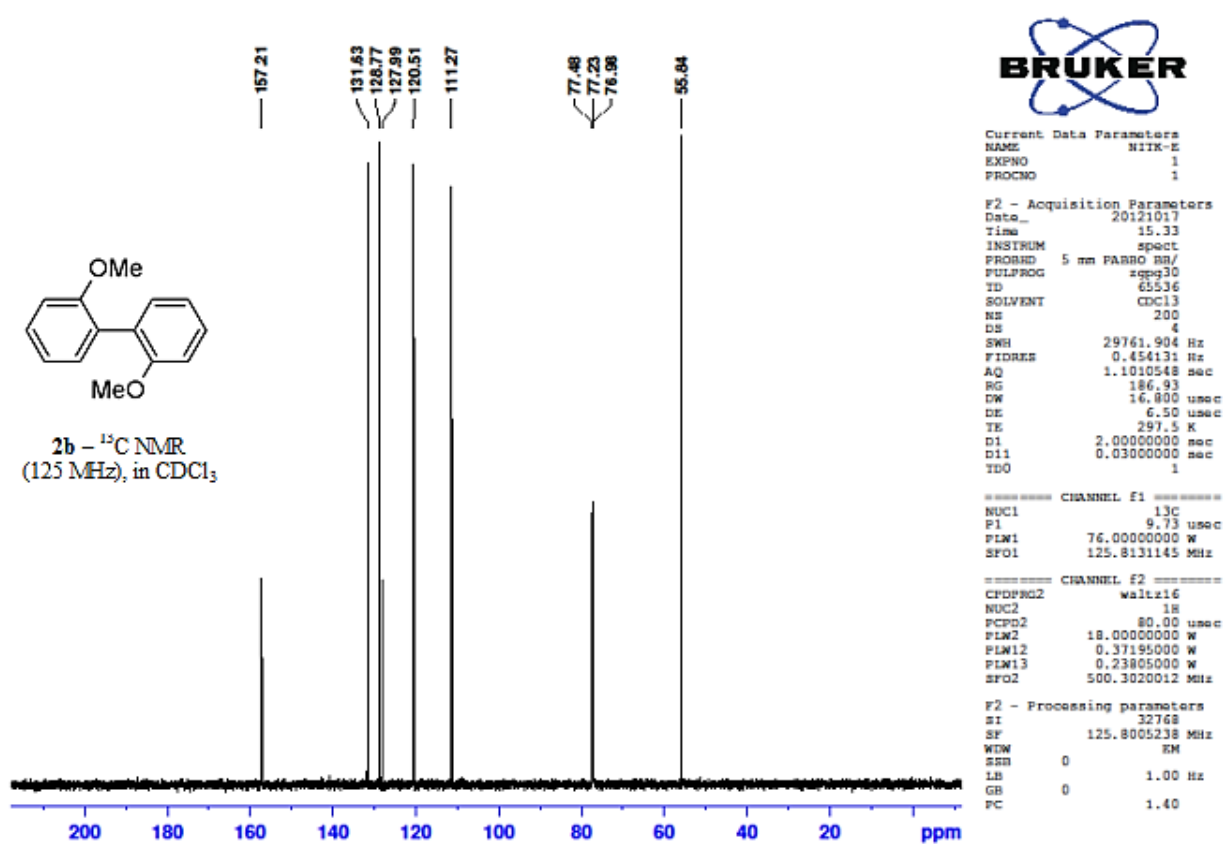

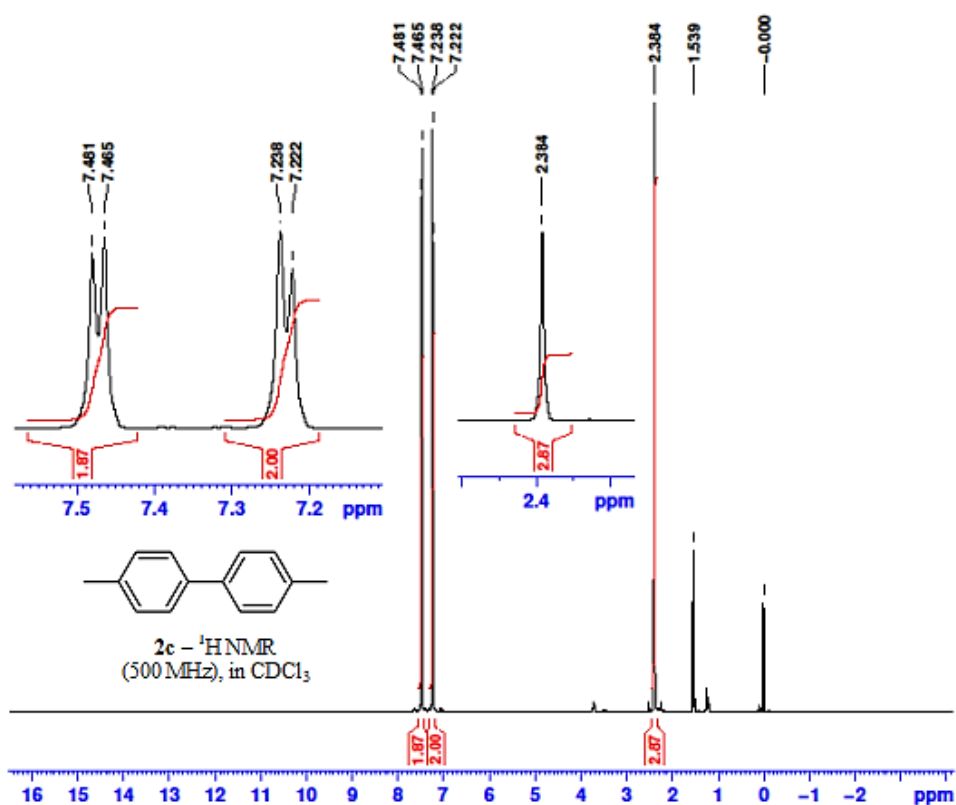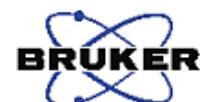

Current Data Parameters  
NAME D  
EXPNO 1  
PROCNO 1

F2 - Acquisition Parameter  
Date\_ 20121013  
Time 16.04  
INSTRUM spect  
PROBHD 5 mm PABBO BB/  
PULPROG zg30  
TD 65536  
SOLVENT  $\text{CDCl}_3$   
NS 16  
DS 2  
SWH 10330.578 Hz  
FIDRES 0.157632 Hz  
AQ 3.1719923 sec  
RG 75.89  
DW 48.400 usec  
DE 6.50 usec  
TE 296.9 K  
D1 1.0000000 sec  
TD0 1

==== CHANNEL f1 ====  
NUC1  $^1\text{H}$   
P1 11.50 usec  
PLM1 18.0000000 W  
SFO1 500.3030896 MHz

F2 - Processing parameters  
SI 65536  
SF 500.3000223 MHz  
WDW EM  
SSB 0  
LB 0.30 Hz  
GB 0  
PC 1.00

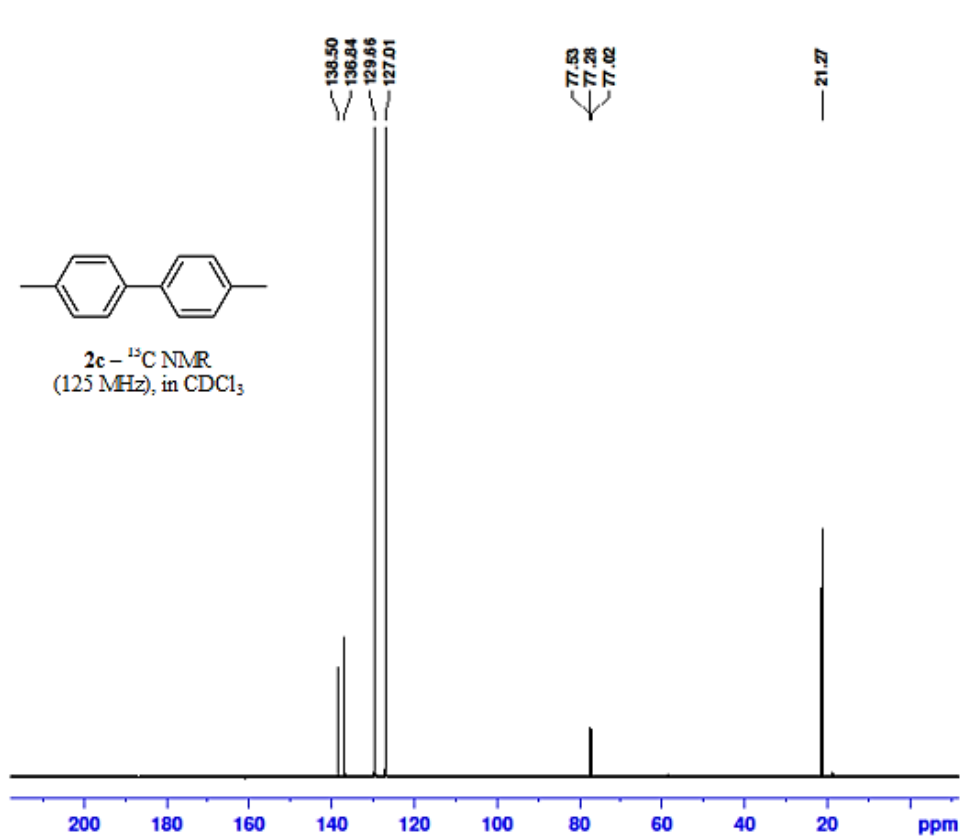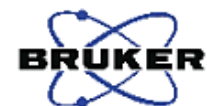

```
Current Data Parameters
NAME      NITK-D
EXPNO    1
PROCNO   1

F2 - Acquisition Parameters
Date_    20121017
Time     14.49
INSTRUM  spect
PROBHD   5 mm PABBO mm/
PULPROG  zgpg30
TD       65536
SOLVENT  CDCl3
NS       237
DS       4
SWH      29761.904 Hz
FIDRES   0.454131 Hz
AQ       1.1010548 sec
RG       186.93
DW       16.800 usec
DE       6.50 usec
TE       297.9 K
D1       2.0000000 sec
D11      0.0300000 sec
TDO      1

===== CHANNEL f1 =====
NUC1     13C
P1       9.73 usec
PLW1     76.0000000 W
SFO1     125.8131145 MHz

===== CHANNEL f2 =====
CPDPRG2  waltz16
NUC2     1H
PCPD2    80.00 usec
PLW2     18.0000000 W
PLW12    0.37195000 W
PLW13    0.23805000 W
SFO2     500.3020012 MHz

F2 - Processing parameters
SI       32768
SF       125.8005350 MHz
WDW      EM
SSB      0
LB       1.00 Hz
GB       0
PC       1.40
```

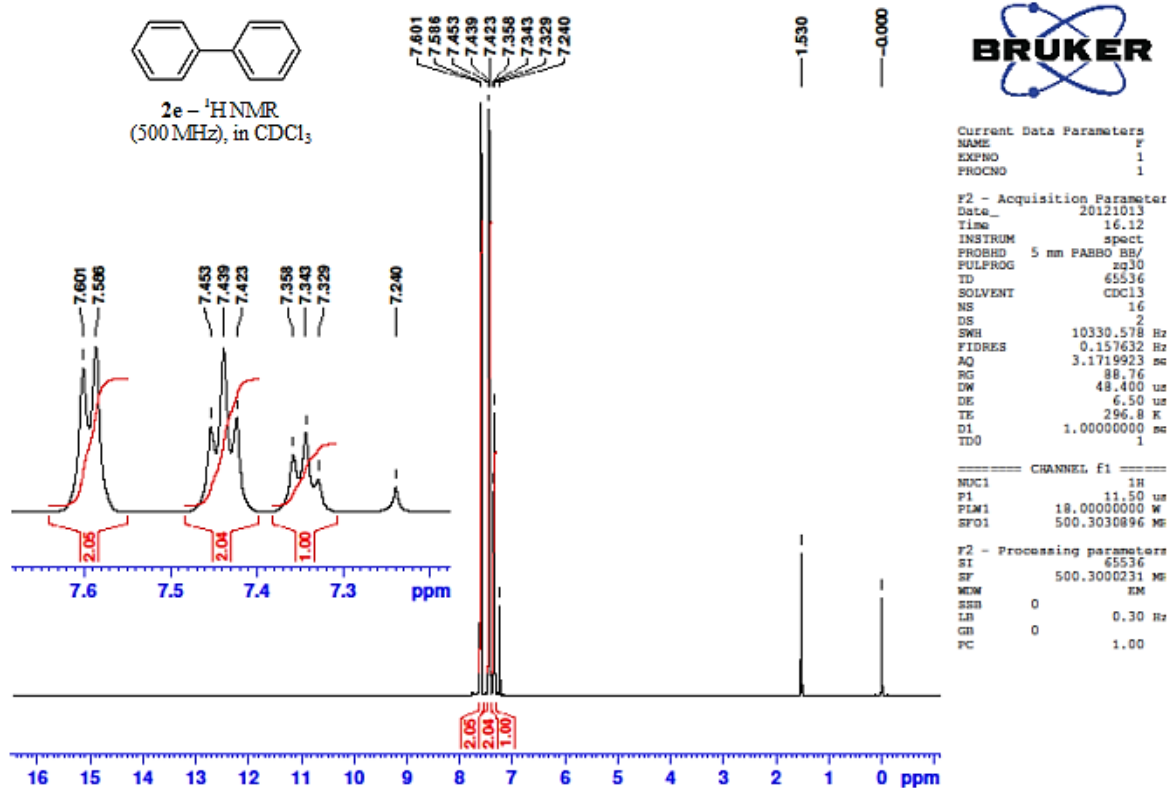

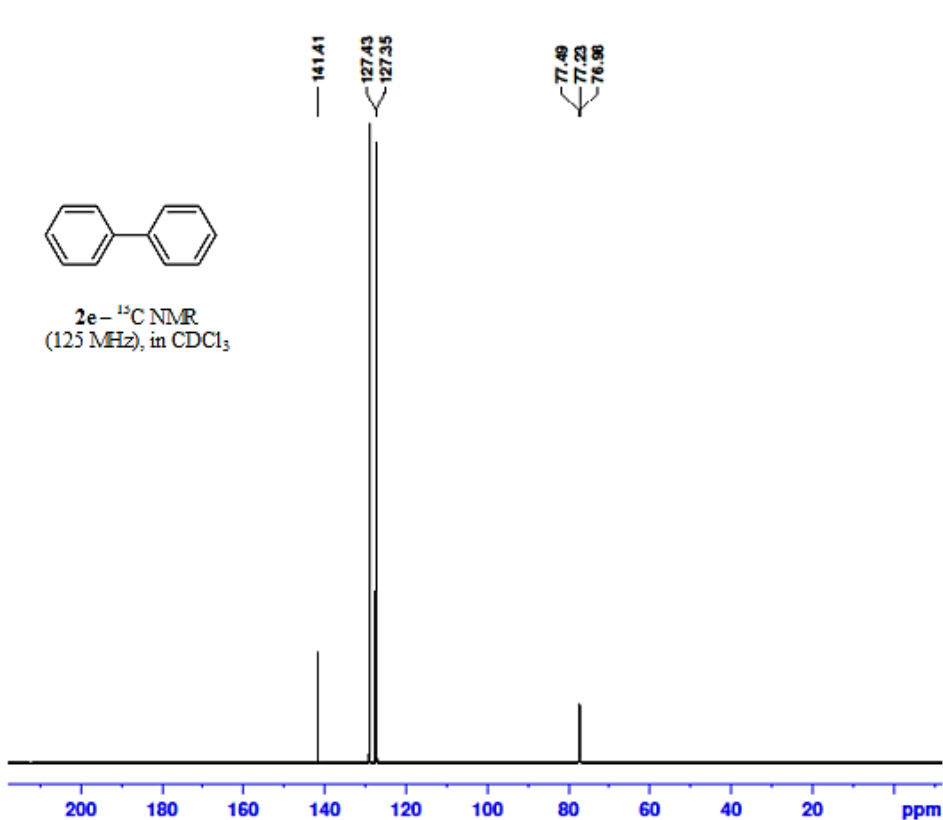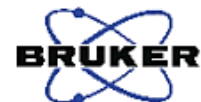

Current Data Parameters  
NAME: N1K-T  
EXPNO: 1  
PROCNO: 1

F2 - Acquisition Parameters  
Date\_: 20121017  
Time: 15.23  
INSTRUM: spect  
PROBHD: 5 mm PABBO MM/  
PULPROG: zgpg30  
TD: 65536  
SOLVENT: CDCl3  
NS: 476  
DS: 4  
SWH: 29761.904 Hz  
FIDRES: 0.454131 Hz  
AQ: 1.1010548 sec  
RG: 186.93  
DW: 16.800 usec  
DE: 6.50 usec  
TE: 298.0 K  
D1: 2.0000000 sec  
D11: 0.0300000 sec  
TD0: 1

==== CHANNEL f1 =====  
NUC1: 13C  
P1: 9.73 usec  
PLW1: 76.0000000 W  
SFO1: 125.8131145 MHz

==== CHANNEL f2 =====  
CPDPRG2: waltz16  
NUC2: 1H  
PCPD2: 80.00 usec  
PLW2: 18.0000000 W  
PLW12: 0.37195000 W  
PLW13: 0.23805000 W  
SFO2: 500.3020012 MHz

F2 - Processing parameters  
SI: 32768  
SF: 125.8005333 MHz  
WDW: RM  
SSB: 0  
LB: 1.00 Hz  
GB: 0  
PC: 1.40

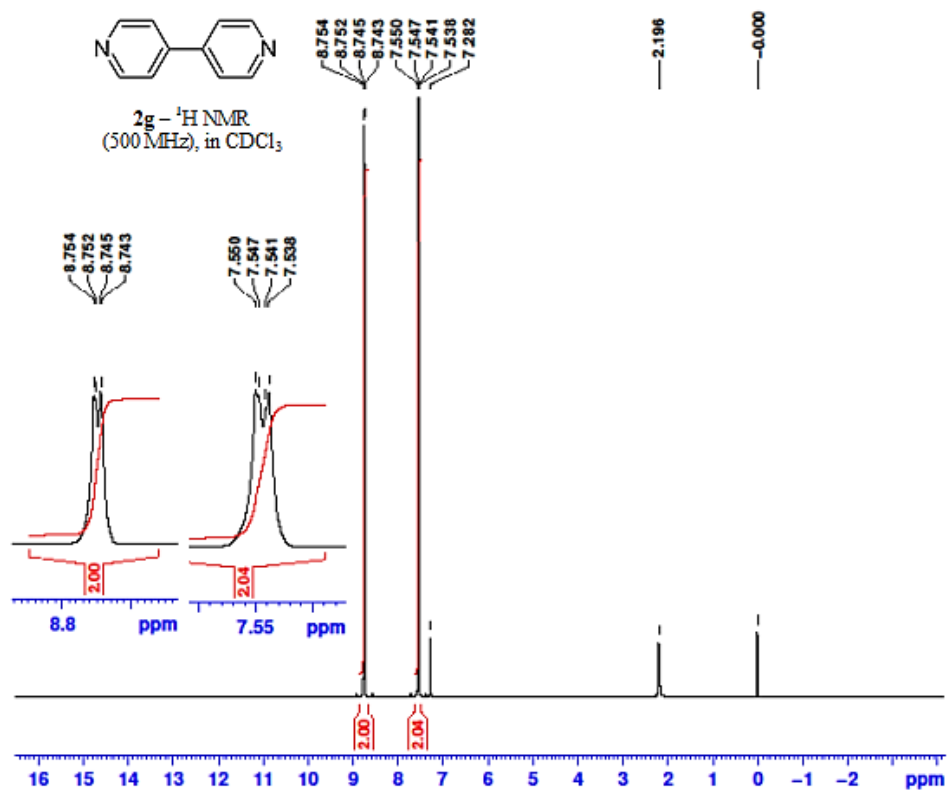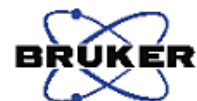

Current Data Parameters  
NAME A  
EXPNO 1  
PROCNO 1

F2 - Acquisition Parameter  
Date\_ 20121013  
Time 15.51  
INSTRUM spect  
PROBHD 5 mm PABBO BB/  
PULPROG zg30  
TD 65536  
SOLVENT  $\text{CDCl}_3$   
NS 16  
DS 2  
SWH 10330.578 Hz  
FIDRES 0.157632 Hz  
AQ 3.1719923 sec  
RG 75.89  
DW 48.400 usec  
DE 6.50 usec  
TE 296.8 K  
D1 1.00000000 sec  
TDO 1

===== CHANNEL F1 =====  
NUC1  $^1\text{H}$   
P1 11.50 usec  
PLW1 18.00000000 W  
SFO1 500.3030896 MHz

F2 - Processing parameters  
SI 65536  
SF 500.3000018 MHz  
WDW EM  
SSB 0  
LB 0.30 Hz  
GB 0  
PC 1.00



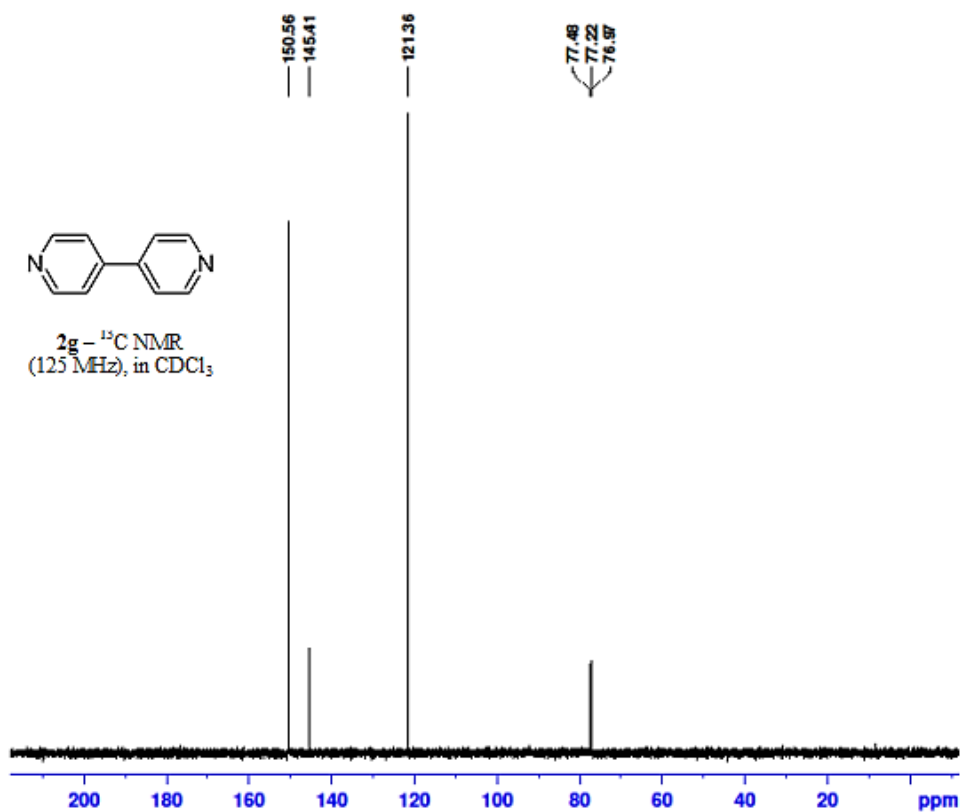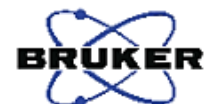

Current Data Parameters  
NAME NITK-A  
EXPNO 1  
PROCNO 1

F2 - Acquisition Parameters  
Date\_ 20121017  
Time 13.49  
INSTRUM spect  
PROBHD 5 mm PARBO BB/  
PULPROG zgpg30  
TD 65536  
SOLVENT cdcl3  
NS 133  
DS 4  
SWH 29761.904 Hz  
FIDRES 0.454131 Hz  
AQ 1.1010548 sec  
RG 186.93  
DW 16.800 usec  
DE 6.50 usec  
TE 297.2 K  
D1 2.0000000 sec  
D11 0.0300000 sec  
TD0 1

==== CHANNEL f1 =====  
NUC1  $^{13}C$   
P1 9.73 usec  
PLW1 76.0000000 W  
SFO1 125.8131145 MHz

==== CHANNEL f2 =====  
CPDPRG2 waltz16  
NUC2  $^1H$   
PCPD2 80.00 usec  
PLW2 18.0000000 W  
PLW12 0.37195000 W  
PLW13 0.23805000 W  
SFO2 500.3020012 MHz

F2 - Processing parameters  
SI 32768  
SF 125.8005350 MHz  
WDW EM  
SSB 0  
LB 1.00 Hz  
GB 0  
PC 1.40

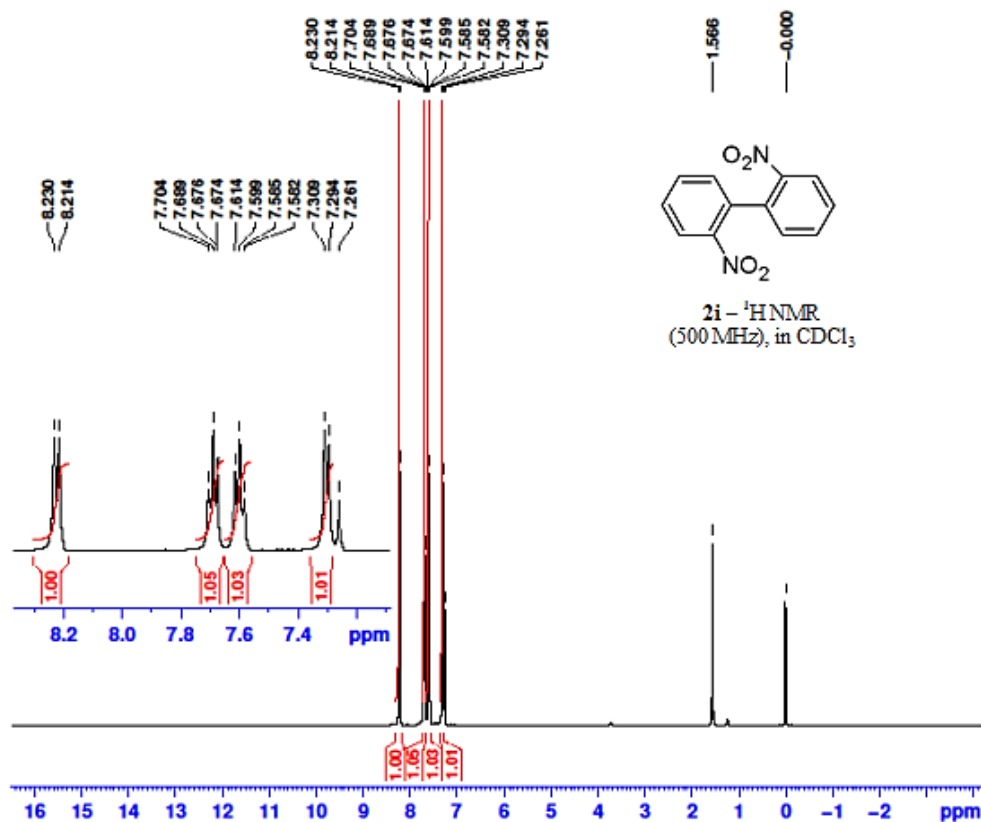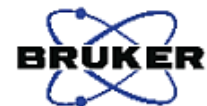

Current Data Parameters  
NAME C  
EXPNO 1  
PROCNO 1

F2 - Acquisition Parameters  
Date\_ 20121013  
Time 16.00  
INSTRUM spect  
PROBHD 5 mm PABBO BH/  
PULPROG zg30  
TD 65536  
SOLVENT CDCl3  
NS 16  
DS 2  
SMH 10330.578 Hz  
FIDRES 0.157632 Hz  
AQ 3.1719923 sec  
RG 93.99  
DW 48.400 usec  
DE 6.50 usec  
TE 296.9 K  
D1 1.00000000 sec  
TD0 1

==== CHANNEL f1 ====  
NUC1 1H  
P1 11.50 usec  
PLW1 18.00000000 W  
SFO1 500.3030896 Mc

F2 - Processing parameters  
SI 65536  
SF 500.3000126 Mc  
WVW EM  
SRR 0  
LB 0.30 Hz  
GB 0  
PC 1.00

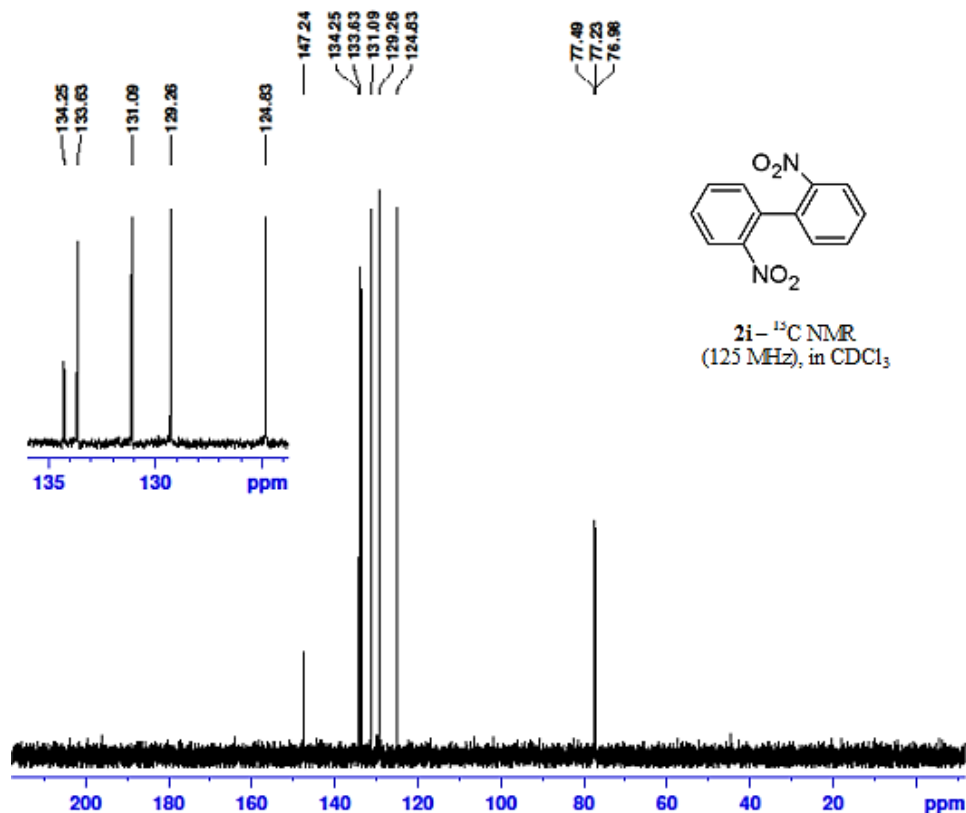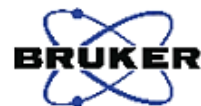

Current Data Parameters  
NAME NITK-C  
EXPNO 1  
PROCNO 1

F2 - Acquisition Parameters  
Date\_ 20121017  
Time 14.26  
INSTRUM spect  
PROBHD 5 mm PABBO BB/  
PULPROG zgpg30  
TD 65536  
SOLVENT cdcl3  
NS 72  
DS 4  
SWH 29761.904 Hz  
FIDRES 0.454131 Hz  
AQ 1.1010548 sec  
RG 186.93  
DW 16.800 usec  
DE 6.50 usec  
TE 297.3 K  
D1 2.0000000 sec  
D11 0.0300000 sec  
TD0 1

==== CHANNEL F1 =====  
NUC1  $^{13}\text{C}$   
P1 9.73 usec  
PLW1 76.0000000 W  
SFO1 125.8131145 MHz

==== CHANNEL F2 =====  
CPDPRG2 waltz16  
NUC2  $^1\text{H}$   
PCPD2 80.00 usec  
PLW2 18.0000000 W  
PLW12 0.3719500 W  
PLW13 0.2380500 W  
SFO2 500.3020012 MHz

F2 - Processing parameters  
SI 32768  
SF 125.8005286 MHz  
WDW EM  
SSB 0  
LB 1.00 Hz  
GB 0  
PC 1.40
